# Supplementary material for: Poor Association between Facial Expression and Mild Lameness in Thoroughbred Trot-Up Examinations
Source: MDPI journal article supplement (doi:10.3390/ani13111727), 2023-05-23
Supplement: s1 [file s1]

**Supplementary Table S1. Association between the HGS and FEReq, and Lameness Locator on a continuous scale.**

|                             |      |       | HDmin       |              |       | PDmin      |       |       | HDmax       |              |       | PDmax      |              |  |
|-----------------------------|------|-------|-------------|--------------|-------|------------|-------|-------|-------------|--------------|-------|------------|--------------|--|
| Predictor                   | N    | Coef. | 95% CI      | P-           | Coef. | 95% CI     | P-    | Coef. | 95% CI      | P-           | Coef. | 95% CI     | P-           |  |
|                             |      |       |             | value        |       |            | value |       |             | value        |       |            | value        |  |
| Stiffly backward ears       |      |       |             |              |       |            |       |       |             |              |       |            |              |  |
| Not present                 | 524  | ref   |             |              | ref   |            |       | ref   |             |              | ref   |            |              |  |
| Moderately present          | 772  | 0.71  | -1.87,3.30  | 0.580        | 0.21  | -0.62,1.04 | 0.607 | 0.38  | -0.93,1.69  | 0.561        | -0.75 | -1.57,0.08 | 0.076        |  |
| Obviously present           | 185  | -3.40 | -7.95,1.15  | 0.139        | 1.40  | -1.32,4.11 | 0.304 | -0.15 | -2.97,2.67  | 0.917        | -1.02 | -3.22,1.17 | 0.352        |  |
| Orbital Tightening          |      |       |             |              |       |            |       |       |             |              |       |            |              |  |
| Not present                 | 1013 | ref   |             |              | ref   |            |       | ref   |             |              | ref   |            |              |  |
| Moderately present          | 289  | -2.36 | -6.58,1.86  | 0.265        | 0.35  | -1.22,1.91 | 0.655 | -1.81 | -3.58,-0.47 | <b>0.044</b> | 0.05  | -0.84,0.94 | 0.910        |  |
| Obviously present           | 97   | -1.45 | -5.88,2.98  | 0.511        | -0.28 | -2.71,2.15 | 0.817 | -1.66 | -4.51,1.19  | 0.245        | -0.33 | -1.87,1.21 | 0.664        |  |
| Tension above the eye       |      |       |             |              |       |            |       |       |             |              |       |            |              |  |
| Not present                 | 483  | ref   |             |              | ref   |            |       | ref   |             |              | ref   |            |              |  |
| Moderately present          | 682  | -1.67 | -5.76,2.42  | 0.413        | -0.05 | -1.41,1.30 | 0.936 | 1.96  | 0.02,3.90   | <b>0.048</b> | -0.37 | -2.16,1.41 | 0.675        |  |
| Obviously present           | 216  | -3.16 | -9.46,3.15  | 0.317        | 0.15  | -1.97,2.27 | 0.888 | 2.28  | -0.98,5.54  | 0.165        | -0.08 | -2.27,2.12 | 0.945        |  |
| Prominent Chewing Muscles** |      |       |             |              |       |            |       |       |             |              |       |            | <b>0.020</b> |  |
| Not present                 | 638  | ref   |             |              | ref   |            |       | ref   |             |              | ref   |            |              |  |
| Moderately present          | 384  | -4.52 | -8.47,-0.56 | <b>0.027</b> | 1.04  | -0.09,2.16 | 0.069 | -0.16 | -2.03,1.72  | 0.865        | 1.28  | 0.27,2.30  | <b>0.014</b> |  |
| Obviously present           | 56   | -4.42 | -8.21,-0.53 | <b>0.027</b> | 0.66  | -1.09,2.41 | 0.447 | -0.37 | -2.82,2.07  | 0.758        | 0.24  | -0.94,1.42 | 0.681        |  |
| Strained Nostrils*          |      |       |             |              |       |            |       |       |             |              |       |            |              |  |

| Predictor                          | N   | Coef. | HDmin       |       | P-value | PDmin      |       | P-value | HDmax      |       | P-value | PDmax      |       | P-value |
|------------------------------------|-----|-------|-------------|-------|---------|------------|-------|---------|------------|-------|---------|------------|-------|---------|
|                                    |     |       | 95% CI      | Coef. |         | 95% CI     | Coef. |         | 95% CI     | Coef. |         | 95% CI     |       |         |
|                                    |     |       |             |       |         |            |       |         |            |       |         |            |       |         |
| Not present                        | 505 | ref   |             |       | ref     |            |       | ref     |            |       | ref     |            |       |         |
| Moderately present                 | 719 | -0.17 | -3.12,2.78  | 0.907 | -0.16   | -1.03,0.72 | 0.721 | 0.66    | -0.70,2.02 | 0.331 | -0.67   | -1.70,0.37 | 0.201 |         |
| Obviously present                  | 133 | -2.92 | -6.92,1.08  | 0.148 | -0.56   | -2.07,0.95 | 0.457 | -0.46   | -2.68,1.76 | 0.676 | -0.32   | -1.94,1.30 | 0.689 |         |
| Mouth Strained**                   |     |       |             |       |         |            |       |         |            |       |         |            |       |         |
| Not present                        | 552 | ref   |             |       | ref     |            |       | ref     |            |       | ref     |            |       |         |
| Moderately present                 | 519 | -1.74 | -6.09,2.62  | 0.425 | -0.66   | -2.04,0.71 | 0.335 | 0.02    | -1.65,1.67 | 0.989 | -1.21   | -3.21,0.80 | 0.231 |         |
| Obviously present                  | 245 | -2.10 | -8.36,4.16  | 0.501 | -0.71   | -3.02,1.60 | 0.538 | 0.92    | -2.12,3.95 | 0.541 | -1.46   | -3.84,0.92 | 0.221 |         |
| Overall Pain*                      |     |       |             |       |         |            |       |         |            |       |         |            |       |         |
| No Pain                            | 753 | ref   |             |       | ref     |            |       | ref     |            |       | ref     |            |       |         |
| Mild Pain                          | 472 | -2.13 | -4.09,-0.17 | 0.034 | -0.15   | -0.85,0.54 | 0.663 | 0.18    | -0.83,1.19 | 0.723 | -0.57   | -1.81,0.67 | 0.356 |         |
| Moderate Pain                      | 192 | -0.93 | -4.22,2.36  | 0.569 | -0.12   | -1.48,1.23 | 0.856 | 1.00    | -0.90,2.88 | 0.293 | -0.76   | -1.98,0.45 | 0.212 |         |
| Severe Pain                        | 63  | -3.17 | -8.15,1.82  | 0.206 | 0.04    | -2.11,0.42 | 0.968 | 1.01    | -1.45,3.49 | 0.408 | -1.24   | -3.18,0.71 | 0.206 |         |
| Ear Position                       |     |       |             |       |         |            |       |         |            |       |         |            |       |         |
| Ears Forward                       | 408 | ref   |             |       | ref     |            |       | ref     |            |       | ref     |            |       |         |
| Erect to side                      | 483 | 1.06  | -2.38,4.51  | 0.537 | 0.04    | -1.05,1.13 | 0.936 | 0.60    | -1.41,2.62 | 0.548 | -1.16   | -2.15      | 0.024 |         |
| One ear forward, one ear back      | 114 | 1.15  | -2.10,4.41  | 0.476 | -0.04   | -0.90,0.81 | 0.919 | 0.28    | -1.43,1.98 | 0.744 | -0.20   | -1.16      | 0.676 |         |
| One ear forward, one erect to side | 130 | 2.09  | -2.08,6.26  | 0.317 | 0.73    | -0.45,1.91 | 0.220 | 0.74    | -1.12,2.60 | 0.425 | 0.88    | -1.33      | 0.425 |         |
| One to side, one to back           | 156 | -1.45 | -6.60,3.70  | 0.571 | 1.00    | -0.70,2.70 | 0.241 | 0.04    | -2.17,2.26 | 0.966 | -1.08   | -2.72      | 0.188 |         |

[illegible]

|                                      |      |       | HDmin       |              |       | PDmin      |       |       | HDmax      |              |       | PDmax      |       |  |
|--------------------------------------|------|-------|-------------|--------------|-------|------------|-------|-------|------------|--------------|-------|------------|-------|--|
| Predictor                            | N    | Coef. | 95% CI      | P-           | Coef. | 95% CI     | P-    | Coef. | 95% CI     | P-           | Coef. | 95% CI     | P-    |  |
|                                      |      |       |             | value        |       |            | value |       |            | value        |       |            | value |  |
| Not present                          | 662  | ref   |             |              | ref   |            |       | ref   |            |              | ref   |            |       |  |
| Present                              | 708  | -0.55 | -4.6,3.47   | 0.782        | -0.38 | -1.61,0.85 | 0.536 | 2.19  | 0.18,4.20  | <b>0.034</b> | -0.46 | -2.04,1.12 | 0.559 |  |
| <b>Strained Nostrils***</b>          |      |       |             |              |       |            |       |       |            |              |       |            |       |  |
| Relaxed                              | 478  | ref   |             |              | ref   |            |       | ref   |            |              | ref   |            |       |  |
| Circular                             | 705  | -0.35 | -3.56,2.85  | 0.824        | -0.10 | -1.05,0.84 | 0.827 | 0.69  | -0.60,1.99 | 0.286        | -0.79 | -2.11,0.53 | 0.234 |  |
| Tense                                | 164  | -3.36 | -7.36,0.63  | 0.096        | -0.40 | -1.84,1.05 | 0.582 | -0.64 | -2.82,1.54 | 0.553        | -0.30 | -1.77,1.18 | 0.686 |  |
| <b>Wrinkles between nostrils***</b>  |      |       |             |              |       |            |       |       |            |              |       |            |       |  |
| Not present                          | 717  | ref   |             |              | ref   |            |       | ref   |            |              | ref   |            |       |  |
| Present                              | 211  | -2.80 | -8.00,2.40  | 0.282        | -0.49 | -1.35,0.37 | 0.251 | 0.26  | -1.60,2.12 | 0.775        | -0.20 | -0.93,0.54 | 0.593 |  |
| <b>Wrinkles Ventral to Nostrils*</b> |      |       |             |              |       |            |       |       |            |              |       |            |       |  |
| Not present                          | 1198 | ref   |             |              | ref   |            |       | ref   |            |              | ref   |            |       |  |
| Present                              | 202  | -3.77 | -7.23,-0.31 | <b>0.034</b> | 0.06  | -1.20,1.32 | 0.924 | -0.46 | -2.54,1.61 | 0.652        | 0.25  | -1.20,1.71 | 0.729 |  |
| <b>Upper Lip*</b>                    |      |       |             |              |       |            |       |       |            |              |       |            |       |  |
| Relaxed                              | 821  | ref   |             |              | ref   |            |       | ref   |            |              | ref   |            |       |  |
| Tense                                | 391  | -2.89 | -6.73,0.96  | 0.137        | -0.34 | -1.57,1.10 | 0.726 | -0.59 | -2.32,1.14 | 0.495        | -0.53 | -1.76,0.70 | 0.386 |  |
| Tense and extended                   | 154  | -1.10 | -4.22,2.03  | 0.508        | -0.94 | -2.46,0.58 | 0.220 | -0.16 | -2.39,2.06 | 0.882        | -0.55 | -1.77,0.67 | 0.364 |  |
| <b>Lower Lip**</b>                   |      |       |             |              |       |            |       |       |            |              |       |            |       |  |
| Relaxed                              | 611  | ref   |             |              | ref   |            |       | ref   |            |              | ref   |            |       |  |

|                                              |      |       | HDmin        |       |       | PDmin      |       |       | HDmax      |       |       | PDmax       |       |
|----------------------------------------------|------|-------|--------------|-------|-------|------------|-------|-------|------------|-------|-------|-------------|-------|
| Predictor                                    | N    | Coef. | 95% CI       | P-    | Coef. | 95% CI     | P-    | Coef. | 95% CI     | P-    | Coef. | 95% CI      | P-    |
|                                              |      |       |              | value |       |            | value |       |            | value |       |             | value |
| Tense                                        | 663  | -1.96 | -7.03,3.11   | 0.438 | -0.44 | -1.93,1.04 | 0.549 | 0.13  | -1.90,2.16 | 0.898 | -1.12 | -3.06,0.81  | 0.247 |
| Nose Twisted*                                |      |       |              |       |       |            |       |       |            |       |       |             |       |
| Not twisted                                  | 1443 | ref   |              |       | ref   |            |       | ref   |            |       | ref   |             |       |
| Twisted                                      |      | 8.39  | -1.97,18.75  | 0.109 | -2.51 | -3.84,-    | 0.000 | 3.57  | 0.05,7.08  | 0.047 | -0.87 | -2.58,0.85  | 0.312 |
|                                              | 47   |       |              |       |       | 1.19       |       |       |            |       |       |             |       |
| Mouth                                        |      |       |              |       |       |            |       |       |            |       |       |             |       |
| Closed                                       | 1006 | ref   |              |       | ref   |            |       | ref   |            |       | ref   |             |       |
| Lips slightly separated: no teeth            | 185  | -2.64 | -7.45,2.18   | 0.275 | -0.37 | -1.94,1.19 | 0.631 | 0.24  | -1.90,2.37 | 0.824 | -1.30 | -2.77,0.17  | 0.082 |
| Lips separated, teeth: no gum                | 52   | -2.86 | -10.26,4.54  | 0.493 | 0.23  | -2.83,3.29 | 0.878 | 1.47  | -1.90,4.84 | 0.381 | -1.80 | -3.72,-0.12 | 0.065 |
| Lips separated, teeth and gum exposed        | 13   | -2.45 | -7.84,2.95   | 0.407 | 0.12  | -4.43,4.67 | 0.957 | 5.51  | 1.55,9.47  | 0.008 | -3.07 | -5.36,-0.77 | 0.010 |
| Teeth slightly separated: tongue not visible | 23   | 0.43  | -6.11,7.98   | 0.777 | 1.17  | -3.04,5.37 | 0.578 | 3.11  | -0.27,6.48 | 0.070 | -1.25 | -3.03,0.52  | 0.161 |
| Teeth slightly separated: tongue visible     | 58   | -2.94 | -8.29,2.41   | 0.286 | -0.28 | -1.98,1.42 | 0.738 | 0.80  | -1.92,3.51 | 0.556 | -1.25 | -3.17,0.71  | 0.206 |
| Mouth widely separated but cannot see tongue | 10   | -3.03 | -9.97,3.91   | 0.593 | 0.35  | -4.59,5.29 | 0.886 | 4.46  | -0.02,8.93 | 0.051 | -2.46 | -4.65,-0.26 | 0.029 |
| Teeth widely separated: tongue visible       | 27   | -3.74 | -8.83,1.35   | 0.108 | -0.59 | -3.60,2.43 | 0.695 | 3.20  | -2.43,8.83 | 0.256 | -1.77 | -5.03,1.49  | 0.278 |
| Tongue                                       |      |       |              |       |       |            |       |       |            |       |       |             |       |
| Tongue in, not visible                       | 1288 | ref   |              |       | ref   |            |       | ref   |            |       | ref   |             |       |
| Tongue seen inside oral cavity               | 106  | -3.11 | -7.43,1.21   | 0.153 | -0.38 | -1.90,1.14 | 0.616 | 0.26  | -2.52,3.04 | 0.849 | -1.33 | -3.04,0.39  | 0.125 |
| Tip of tongue protruding, no teeth           | 24   | -6.19 | -10.76,-1.62 | 0.009 | 0.85  | -3.03,4.73 | 0.661 | -1.09 | -4.56,2.38 | 0.529 | -0.22 | -4.17,3.72  | 0.910 |

| Predictor                                       | N  | Coef. | HDmin        |              | Coef. | PDmin      |              | Coef. | HDmax       |              | Coef. | PDmax      |              |
|-------------------------------------------------|----|-------|--------------|--------------|-------|------------|--------------|-------|-------------|--------------|-------|------------|--------------|
|                                                 |    |       | 95% CI       | P-           |       | 95% CI     | P-           |       | 95% CI      | P-           |       | 95% CI     | P-           |
|                                                 |    |       |              | value        |       |            | value        |       |             | value        |       |            | value        |
| Tip of tongue protruding, can see teeth         | 10 | -8.63 | -13.02,-4.25 | <b>0.000</b> | 1.72  | -1.76,5.19 | 0.324        | -0.75 | -6.38,4.88  | 0.789        | 1.09  | -2.09,4.27 | 0.491        |
| Large part of tongue out, but teeth not exposed | 0  |       |              |              |       |            |              |       |             |              |       |            |              |
| Large part of tongue out and teeth exposed      | 1  | -8.87 | -12.75,-5.00 | <b>0.000</b> | 3.90  | 3.17,5.63  | <b>0.000</b> | -4.11 | -5.93,-2.29 | <b>0.000</b> | 2.73  | 1.39,4.07  | <b>0.000</b> |

\*interobserver reliability of <0.40; \*\* parameters with >10% missing; \*\*\*parameters with >10% missing and inter-reliability of <0.40
